# Supplementary material
Source: Research Square preprint supplement (doi:10.21203/rs.3.rs-10148031/v1)
Supplement: Supplementary file 1 [file bc0107be078719baf4a2d221.xlsx]

## Sheet: KEY
Key- Barriers, facilitators or strategies specific to a certain:
Type of workplace
Geographical setting
Priority population group
Living guidelines

## Sheet: Theme 1
Theme	Sub themes	Barrier examples	Illustrative quotes	Facilitator examples	Illustrative quotes	Relevant CFIR construct(s)	Strategy examples	Illustrative quotes	Relevant ERIC strategies
Developing trustworthy guidelines	Generating acceptable guidance for diverse contexts and audiences	When care providers or managers disagree with guideline recommendations.		When there is high guideline buy in from intended users due to heavy input during its development.	"You're not funded. So the wonderful thing about our manuals is the ownership felt by the community women and the health services,. So the actual grant doesn't fund any of that. It funds for a product. The thing is, though, the stakeholders are invested because this was written by the stakeholders. " GD13	Individuals - innovation deliverers (and leaders of all levels): motivation Inner setting - opinion leaders Implementation process - engaging: innovation deliverers (facilitator)	Incorporating meaningful engagement with postnatal providers, managers and other postnatal organisations during guideline development.		Conduct local consensus discussions Use advisory boards and workgroups Build a coalition Involve executive boards
		Care providers feel guideline recommendations and policy decisions are often driven by funding rather than evidence.	"Because, you know, this practice has just been to get women out the door, you just cannot imagine the pressure to get women out the door that exists in hospitals now. It's just shameful. Like the people that sit in those decision making roles about this have this on their heads. Like the problems we are seeing with trauma and infant mother bonding. I'm sorry, this is where it starts and it's on …			Innovation - evidence-base Outer setting - local conditions Inner setting - available resources: funding, culture: deliverer-centeredness Individuals - innovation deliverers: motivation	Evaluating and reporting both the clinical effectiveness and cost effectiveness of guideline recommendations.	"So if we've identified priorities, we have that information, we would then develop guidance on those priorities. Work out, there might be initially identified priorities, other topics where it's emerged that we've developed guidance that would reflect a change in practice, or we think it will. And then you would measure practice, and you would run and implementation that was appropriate to whate…	Develop and implement tools for quality monitoring Purposely reexamine the implementation Use data experts
		Guidelines and policies that don't allow for individual circumstances and clinical judgement.	"you've got to look at the baby and that's what I feel like ... this protocol doesn't allow for... the overall picture." FM01	Guidelines illustrate the importance of individualised, respectful, woman centred care.		Innovation - adaptability Individuals - innovation deliverers: motivation Inner setting - culture: recipient and human equality-centeredness	Early during guideline development, establish a writing style guide to ensure the language used is consistent and inclusive. Ensuring intentional and inclusive language is used during the writing of guidelines promotes respectful, woman-centred care.		Tailoring strategies Develop educational materials Involve patients/consumers and family members Promote adaptability
		Guidelines that do not cater for the complexities associated with rural, remote, resource limited settings, or priority populations.				Innovation - design, adaptability Outer setting - local conditions Individuals - innovation recipients: needs
		When guidelines do not feel like they are written by or for care providers (tone and language does not resonate with the intended audience).	"Our remit from our funders is to aim this at clinicians, but we're aware that other people will also be accessing it. So we're trying to write it in such a way that it's not completely incomprehensible like we're trying to write it in as plain language as we can. But you know, we're aware that, that it's not, you know, we're not bringing the expertise of writing for consumers into that, you know…	Guidelines that utilise multidisciplinary input and feedback during development.		Innovation - design Individuals - innovation deliverers: motivation
				Ensuring recommended practices are cost effective.		Innovation - relative advantage, cost Individuals - high- and mid-level leaders: motivation	Evaluating and reporting the cost effectiveness of a guideline.		Develop and implement tools for quality monitoring Purposely reexamine the implementation Involve executive boards Use data experts
	Utilising feedback during guideline development	When guidelines are not developed by or with care providers and decisions are driven primarily by funding considerations.		When any care providers can provide feedback on recommendations.		Innovation - design Inner setting - culture: deliverer-centeredness Individuals - innovation deliverers: motivation Implementation process - assessing needs: innovation deliverers	Incorporating meaningful engagement, including feedback with postnatal providers, managers and other postnatal organisations during guideline development. Evaluate both clinical and cost effectiveness of guideline recommendations. Transparently report guideline funding source and who is in the development team.	"I suppose what it [getting feedback from care providers] does is it helps you to make sure that the document you're writing meets the needs of the person who has no idea about the service." GD01 "getting them involved early so that it's not sprung on them. They knew when it was coming and that they could make the plans that they needed to make as well." GD09	Conduct local consensus discussions Use advisory boards and workgroups Build a coalition Involve executive boards Develop and implement tools for quality monitoring Purposely reexamine the implementation Use data experts Develop an implementation glossary Use advisory boards and workgroups
		When guideline developers seek care provider feedback but do not receive it/has been rushed. Care providers are too busy to be involved in guideline development and feedback, or are not given enough time to complete feedback.				Implementation process - engaging: innovation deliverers, assessing needs: innovation deliverers Inner setting - work infrastructure (time pressure) Individuals - innovation deliverers: opportunity
		When not all care providers providing feedback on the guideline agree on recommendations.				Innovation - evidence-base, complexity Individuals - innovation deliverers: motivation
		When feedback processes for the guideline are not transparent.				Innovation - design Individuals - innovation deliverers and implementation leads: motivation	Clear reporting of feedback processes within the guideline (or additional information files). Ensuring everyone who submits feedback receives a reply (e.g. feedback accepted or explanation of why it wasn't incorporated).		Develop and implement tools for quality monitoring Obtain and use patients/consumers and family feedback Purposely reexamine the implementation
	Enhancing the trustworthiness of guidelines and their recommendations	When guidelines are out of date.		When guidelines are updated frequently and evidence used is current/relevant.	"If they know it's the most up to date, why would you go to something that's less." MW11	Innovation - relative advantage, evidence-base Individuals - innovation deliverers and implementation leads: motivation
		When recommendations are not based on evidence. Evidence for many postnatal care topics is lacking. This results in many guideline recommendations being reached by consensus. Consensus recommendations are not taken as seriously by some care providers who will instead "follow their gut".		Clear reporting of recommendation's evidence and explanation of clinical implications and benefits.	"So I think in clinical practice, people need to get the answer they need it quickly and be reassured that it is contemporary current evidence based" GD04	Innovation - evidence-base Individuals - innovation deliverers and implementation leads: motivation	Make evidence and risk versus benefit information clear and accessible within guidelines. This includes the benefits for postpartum people, babies, care providers and facilities. Grade the strength of evidence used to develop recommendations, ideally using GRADE methodology. This will assist care providers in explaining recommendations to postpartum people and help guideline developers when incor…		Develop educational materials Conduct local consensus discussions Prepare patients/consumers to be active participants Tailor strategies Develop and implement tools for quality monitoring Centralize technical assistance Develop educational materials Prepare patients/consumers to be active participants Centralize technical assistance Develop an implementation glossary Facilitate relay of clinical …
		Awareness of living guideline processes is currently low. Decision makers at all levels (funders, facility executives, managers, providers) need to have confidence in the methods to trust recommendations.	"And so I think people are not generally aware of living guidelines unless they're into guidelines and not even then. So not many guidelines are living yet. But I think you know, in contrast to that, I think people would like to hope that the guidelines they're looking at are up to date" KI01 "So I'm not sure that people are very aware of living guidelines. People seem to think it's a good idea w…	When guidelines clearly report their (rigorous) development processes that include evidence reviews and stakeholder input/feedback.		Individuals - innovation deliveres (and leaders of all levels): capability and motivation Innovation - source, design, evidence-base	Promoting the benefits of utilising living guidelines, including having the most up to date evidence-based recommendations.	"It would be about promoting the document as the most up to date data base for people to get the evidence to support the policies and the procedures they do, so it's a one stop shop." KI03	Develop educational materials Distribute educational materials Informing local opinion leaders Tailor strategies
				Guidelines that are endorsed by colleges and peak professional bodies.		Innovation - source Outer setting- external pressure Individuals - innovation deliverers and implementation leads: motivation	Seeking guideline endorsement from relevant colleges and peak professional bodies and then using these to promote and disseminate the guidelines.		Involve executive boards Identify and prepare champions Promote network weaving
				Guidelines that have a positive track record as a guideline.		Innovation - source, relative advantage Individuals - innovation deliverers and implementation leads: motivation

## Sheet: Theme 2
Theme	Sub themes	Barrier examples	Illustrative quotes	Facilitator examples	Illustrative quotes	Relevant CFIR construct(s)	Strategy examples	Illustrative quotes	Relevant ERIC strategies
Satisfying providers with approachable, concise guidelines		Guidelines that are unnecessarily long and difficult to navigate. This results in providers missing sections or resources within guidelines.		When guidelines are concise and easy to navigate.	“Something that is clear and doesn't have multiple pages is helpful. What I need is on that first page.” MW09 “Tell me what I need to know quickly and visually, and not too overwhelming.” MW09	Innovation - complexity, design Individuals - innovation deliverers: capability	Evaluating guideline usability and making adjustments as appropriate. Keeping guidelines concise, clear and simple. Developing recommendation summaries that link related topics.		Develop and implement tools for quality monitoring Purposely reexamine the implementation Tailor strategies Use data experts Develop educational materials Tailor strategies Develop educational materials Tailor strategies Change records systems Tailor strategies
		When sub-recommendations (e.g. for a specific context or population group) are hidden within text rather than stated explicitly making them difficult to find.		When guidelines have a search function to find content easily		Innovation - complexity, design Inner-setting - culture: human equality-centeredness	Working with software specialists to optimise tech usability of guidelines and resources. Developing a search function that providers can use to find relevant content quickly. Having recommendations separate to background and evidence sections.		Change physical structure and equipment Change records systems Promote network weaving Develop educational materials Tailor strategies Change physical structure and equipment Remind clinicians Develop educational materials Tailor strategies Develop educational materials Tailor strategies
		Guidelines that do not include enough information about implementation (no implementation plan) leading to different interpretations of recommendations.	"that there's some national policy documents that don't have implementation plans attached to them, and that can be quite problematic in guideline development. And yeah, so the national breastfeeding strategy doesn't have an implementation plan and it hasn't been picked up, it's been lying dormant since 2019 and same with the National Woman Centred Care Strategy, I think there's some opportunity …			Innovation - complexity, design Individuals - implementation leads, facilitators and innovation deliverers: capability Implementation process - tailoring strategies	Creating standard operating procedures and/or detailed implementation plans to assist local implementation.		Provide local technical assistance Develop a formal implementation blueprint Develop educational materials Tailor strategies Develop and implement tools for quality monitoring
		Guidelines are often not available in multiple languages for bilingual care providers.				Innovation - design, adaptability Individuals - innovation deliverers: capability Inner setting - culture: human equality-centreredness Implementation processing - assessing needs: innovation deliiverers	Translating guidelines into multiple languages.		Tailor strategies Prepare patients/consumers to be active participants Develop educational materials
		When the intended audience - the profession that will actually implement the clinical practice recommendation - is not clear.				Innovation - design, complexity Inner setting - work infrastructure Individuals - innovation deliverers: capability
		Guidelines that do not include referral pathway recommentations or a directory of services.		When clear referral pathways are included in guidelines.		Innovation - design, complexity Inner setting - work infrastructure	Developing an E-directory of services and referral pathways. The types of services included will depend on how 'local' the guideline audience is.		Change physical structure and equipment Promote network weaving Remind clinicians Tailor strategies
		Guidelines that lack educational resources that align with recommendations to refer postpartum families to.		When guidelines link to useful educational resources to share with families.		Innovation - design Individuals - innovation recipients: needs	Designing or linking to pre-existing, evidence based educational resources for postpartum families that align with guideline recommendations.		Prepare patients/consumers to be active participants Develop educational materials Promote network weaving
		When providers are sent frequent guideline updates on basic postnatal concepts to those with experience, leading to disengagement with future guideline communications.				Implementation process - engaging innovation deliverers Individuals - innovation deliverers: motivation	Ensure guideline topics and recommendations are meeting the needs/clinical questions care providers have. Tailor content and frequency of communications about guideline updates to the various audience groups to enhance engagement.		Conduct local needs assessment Conduct local consensus discussions Tailor strategies Purposely reexamine the implementation Tailor strategies Purposely reexamine the implementation Develop educational materials
				When guidelines include flow charts.		Innovation - design, complexity Individuals - innovation deliverers: capability	Developing flowcharts and decision trees to include within the guideline. These should be easily accessible for the provider (e.g. on the intranet or printed). Facilities developing checklists or care plans that incorporate guideline recommendations. Useful in busy environments, however can lead to postpartum people feel like they are being rushed through with 'tick boxes'.		Develop educational materials Change physical structure and equipment Remind clinicians Tailor strategies Develop educational materials Change records systems Remind clinicians
				Guidelines that link to useful links for providers including continuing education.		Innovation - design, complexity Individuals - innovation deliverers: capability Inner setting - learning centeredness

## Sheet: Theme 3
Theme	Sub themes	Barrier examples	Illustrative quotes	Facilitator examples	Illustrative quotes	Relevant CFIR construct(s)	Strategy examples	Illustrative quotes	Relevant ERIC strategies
Reaching diverse audiences	Building guideline awareness for all care providers	Many care providers have a low awareness of and have minimal engagement with postnatal guidelines.	"So I think there's kind of all this information outside of... where we usually look on the Intranet, for example, for staff, that is really important and beneficial and helpful, so I guess… Yeah, I and I know it's all on like NSW health but how do, we, how do we like how do we?" FM08			Individuals - innovation deliverers: capability, motivation Inner setting - communication, learning centeredness	Developing a communications/ dissemination plan for the guideline. Ideas for dissemination include: - Presenting and having a stall for the guideline at relevant clinical conferences. - Visiting and presenting the guidelines at facilities. - Creating a social media strategy. - Jumping on hot topics in the media and relevant awareness weeks. - Creating visually appealing marketing materials.	"Umm. I guess it's education, I suppose it's like maybe having, I suppose something like… I don't know what Safer Care Victoria is known for Intrapartum and antenatal. We need something that's a gold standard for the postnatal period, I suppose. And the advice that we should be giving. Where we should be.. it's like an umbrella guideline. Yeah, and make it very known." MW11	Tailor strategies Develop educational materials Distribute educational materials Conduct educational meetings Conduct educational outreach visits Use mass media Use mass media Develop educational materials
		Providers are concerned about missing changes to recommendations and doing the "wrong thing". This is especially a concern providers have for living guidelines. Providers will not usually check guideline or policy changes for common procedures.	"So unless they're actually actively used, and they do, the guidelines get used a lot here. So people really refer to them, so they will go to them and that's when they'll go “Ohh, when was this updated?” and it's been like two or three months and they've just realised that there was a change of practice." GD08 "how do we keep up to date? And how do they know it's been updated or changed? And how…			Individuals - innovation deliverers: capability, motivation Innovation - adaptability, complexity	Creating a guideline membership/subscription that sends emails and newseltters for each guideline update. Developing a guideline website that clearly displays any recent changes and updates. At a facility level, sharing information about local implementation via: - Managers and educators sharing updates on group message boards and private social media pages. - Hosting hospital journal clubs. - Cr…		Remind clinicians Develop educational materials Remind clinicians Develop educational materials Distribute educational materials Remind clinicians Conduct educational meetings Develop educational materials Distribute educational materials
		Getting care providers attention to communicate guideline updates is difficult (providers have limited capacity for non-patient related communications).				Inner setting - work infrastructure (time), communication Individuals - innovation deliverers: motivation, opportunity	Using a variety of trusted sources to share guideline updates via email, traditional media and/or social media. Trusted sources include: - Guideline member organisations - Peak professional bodies - Government bodies - Clinical experts / champions - Facility managers and educators Promoting the benefits of the guideline (for postpartum families, care providers, and facilities).		Tailor strategies Distribute educational materials Start a dissemination organization Use mass media Inform local opinion leaders Identify and prepare champions Obtain formal commitments Inform local opinion leaders Involve executive boards Prepare patients/consumers to be active participants
		The challenges of capturing different staff groups (including casuals, students, nurses, night shift staff) when changes to guidelines are made.				Inner setting - work infrastructure, communication Implementation process - planning, engaging: innovation deliverers	Sharing guideline and policy updates at inservices and ward meetings held at double staff time. Sharing video updates that staff can view asynchronously.		Conduct educational meetings Organize clinician implementation team meetings Develop educational materials Make training dynamic Distribute educational materials
		Postnatal care has numerous, diverse professions and care models to reach and guide for.	"there's a broad range of sort of clinical practice profiles. So I'm an academic obstetrician at a public hospital yeah, so the way I get information is different to the way other people get information." GD09	When guideline developers have connections with relevant postnatal groups,leaders and facility managers who can help promote and disseminate guidelines.		Outer setting - partnerships and connections (barrier and facilitator) Inner setting - structural characteristics, relational connections Innovation - complexity Implementation process - engaging: innovation deliverers (facilitator)	Utilising a multi-pronged approach to dissemination to reach a variety of intended audiences. Sending targeted amounts and types of information to different guideline audience groups.	"Given the guidelines are to be targeted at anyone who might come into contact with a postnatal person they are very broad and vague. I wonder if there needs to be clearer delineation of which parts of the guideline are more applicable to certain groups. The information presented is likely too simple in some areas for GPs but hits the mark more with the pre-eclampsia and hypertension section." GP…	Tailor strategies Distribute educational materials Tailor strategies Distribute educational materials
		Guidelines are now competing with social media influencers providing clinical guidance (of varying quality)	"I mean in this day and age where people are going to social media influencers who have such slick, you know presence, we can't be lagging behind it...You know the evidence-based ones seem to be the most boring and least slick.Why would anybody go to them? Because our attitude has always been build it and they will come. Write it and they will come. But that's not true anymore. People don't come …			Outer setting - local conditions, societal pressure Innovation - source	Promoting and marketing the guideline utilising new approaches to reach a tech savvy workforce. For example, promote the guideline on podcasts and the social media accounts of trusted clinicians. Creating and sharing short informative 'tiktok' style videos demonstrating role play scenarios.		Tailor strategies Distribute educational materials Make training dynamic Use mass media Inform local opinion leaders Develop educational materials Distribute educational materials Make training dynamic Use mass media Model and simulate change
		The challenge of ensuring subscriber lists for guidelines are kept up to date and include current managers of all relevant facilities, districts, providers.				Inner setting - IT infrastructure, structural characteristics Outer setting - partnerships and connections	Ensuring multiple people from each relevant jurisdiction (e.g. maternity facility) are on subscriber lists.		Promote network weaving Identify and prepare champions Use mass media
		Most guidelines do not incorporate an evaluation of guideline awareness and compliance.				Implemenation process - reflecting and evaluating: implementation	Measuring and evaluating who is using the guideline to plan targeted dissemination plans.		Tailor strategies Develop and implement tools for quality monitoring Develop and organize quality monitoring systems Use data experts Intervene with patients/consumers to enhance uptake and adherence
	Identifying and accessing guidelines	When it is challenging to access relevant guidelines.		When guidelines are identifiable and easy to access (e.g. freely accessible online).	So I think in clinical practice, people need to get the answer they need quickly and be reassured that it is contemporary current evidence based" GD04 "I mean having easily accessible guidelines is always going to be useful. But how you then let people know about them and then how you then like encourage people to utilise them are very different next steps." GPO06	Inner setting - IT infrastructure, access to knowledge and information Innovation - design	Ensuring guidelines are free to access. Developing a guideline app that integrates with medical records and appointment schedules. Sharing guidelines on social media of peak professional bodies and medical parents forums. Posting national and state/territory guidelines on facility intranet systems (that commonly already store local guidelines). Creating a national repository of postnatal guidelin…	"It's very, very exciting that there's living evidence guidelines, but again, it's word of mouth. It is embedding it into practice and just becoming like you know, when you're rural area nurse or midwife and you use your primary clinical care manual, it becomes your bible and you just know that that is where you go to implement." GD04	Use other payment schemes Access new funding Develop educational materials Change record systems Use data warehousing techniques Remind clinicians Use mass media Inform local opinion leaders Obtain formal commitments Change record systems Distribute educational materials Obtain formal commitments Distribute educational materials Centralize technical assistance Use other payment schemes
		The challenge of choosing which guidance to follow when multiple guidelines exist.		When it is clear which guidelines to follow (e.g. facility guidelines and policies).		Outer setting - policies and laws, local conditions Inner setting - mission alignment Individuals - innovation deliverers: capability Innovation - relative advantage	Ensuring orientation for providers new to a facility includes information about how to access facility guidelines. Including links to relevant guidelines (e.g. national guidance) within medical records.		Develop an implementation glossary Conduct ongoing training Facilitate relay of clinical data to providers Change record systems Remind clinicians
		There is no repository of postnatal guidance for GPs.				Outer setting - local conditions	Linking national postnatal guidance to other well used clinical guidelines. For example the E-therapeutic guidelines for GPs.		Promote network weaving Remind clinicians Develop resource sharing agreements Obtain formal commitments
		Australia's peak professional body for obstetricians (RANZCOG) does not have postnatal guidelines for obstetricians to follow.				Outer setting - local conditions, policies and laws Individuals - innovation deliverers: capability
		Certain postnatal topics lack guidelines (within Australia).				Outer setting - local conditions Individuals - innovation deliverers: capability
		Providers lack the time to comprehensively investigate the latest evidence and guidance.	"How do you know about it [guidelines] and how do you go about looking for that without like it taking heaps of time. You need some way that you can refer to it easily, some sort of way that you could know about it." FM08			Inner setting - work infrastructure, available resources Individuals - innovation deliverers: capability Innovation - complexity	Creating concise visual representations of updates that can be displayed as posters in provider workspaces. For guidelines with regular updates (living guidelines), consider bundling smaller updates together to minimise oversaturating provider communications.		Develop educational materials Distribute educational materials Remind clinicians Tailor strategies Purposely reexamine the implementation
		Providers who need to work offline for periods of time due to poor internet connectivity (e.g. in rural and remote environmetns) cannot receive guideline updates immediately. This is particularly problematic for living guidelines.				Inner setting - IT infrastructure, physical infrastructure Outer setting - local conditions Innovation - design	Developing a guideline app that has offline functioning (that updates as soon as internet connectivity is restored). Using hard copies of guidelines ONLY in areas of poor internet connectivity (e.g. rural and remote areas). These need to include a disclaimer that the online version is the latest version to be followed.		Develop educational materials Change physical structure and equipment Make training dynamic Tailor strategies Develop educational materials Distribute educational materials Change physical structure and equipment

## Sheet: Theme 4
Theme	Sub themes	Barrier examples	Illustrative quotes	Facilitator examples	Illustrative quotes	Relevant CFIR construct(s)	Strategy examples	Illustrative quotes	Relevant ERIC strategies
Navigating structural and resource limitations for implementation	Mitigating resource scarcity during guideline implementation	A lack of government funding for the postnatal period that appears to stem from a general lack of appreciation for the importance of the postnatal period.	"I just think more of a focus from the government side of things of postnatal. I mean, it's great that they've highlighted Women's Health now and that's a huge focus for the next five years but in particular, we are trying to support women through the next five years, and part of that, a big part of that I think is women's, you know, postnatal care so that we can actually foster children to actua…	Slowly, there appears to be an increasing awareness of the importance of the postnatal period amongst Australia's general public. Other cultures have a much higher respect for the postnatal period (that Australia could learn from and embrace).	"if we just took a leaf out of the traditional cultures across the world where the postnatal period is such an important period, it's a time for so much to be done to support a mother and a baby and a family. We give that postnatal period the, you know the importance it deserves, yeah." GD06	Outer setting - financing, local conditions, societal pressure
		Guidelines that are funded for a contracted amount of time and developers are unsure if funding will continue beyond this.		When guidelines align with government priorities and strategies they are more likely to receive funding. For example, Australia's Women Centred Care Strategy.		Outer setting - financing Implementation process - planning	Ensuring processes are put in place that allow for sustainable and ongoing guideline updates and implementation. For example: - Create networks with other guideline developer groups to share resources - Developing online guideline training resources that require little upkeep or ongoing costs (compared to in person training)		Purposely reexamine the implementation Involve executive boards Promote network weaving Develop resource sharing agreements
		Funding for guidelines rarely covers costs for implementation planning or execution.		When a guideline development group receives funding for guideline development and implementation (often from government).		Outer setting - financing Inner setting - available resources Implementation process - planning	Advocating for more funding that includes guideline implementation (especially from the government). Demonstrating cost effectiveness of implementing guideline recommendations will strengthen case for funding. Fundraising for guideline implementation activities.		Access new funding Fund and contract for the clinical innovation Involve executive boards Develop and implement tools for quality monitoring Access new funding Involve executive boards
		Guidelines that go beyond 6-8 weeks postpartum often do not receive funding.				Outer setting - financing, local conditions
		Smaller states and facilities, as well as rural and remote settings often have less resources and funding for guideline development and implementation. Local resources and staffing do not match what is required to implement national or state guidance. Prohibitive cost of certain assessment tools and technologies that are recommended in guidelines.	"we can say we've got this great new shiny policy or guideline, but we don't actually have what we need to put it into practice. " GD11 "I mean the thing with very remote is it always comes down to resourcing. Health is under resourced, municipal services are under resourced, education is under, police, is under resource. So it's the same and all the literature will tell you the further out you a…	Having a trustworthy national guideline can save time for local guideline developers with less resources.		Outer setting - local conditions, financing Inner setting - funding, materials and equipment, work infrastructure. Innovation - cost	When specific resources are required to implement a national or state/territory guideline recommendation, ensure these are available at all relevant facilities.	"If the guidelines published and this is what we're meant to be following, you know I would actually say that the organisation has a responsibility to provide the resources to let people work as per the guidelines because if you’re standing in the coroner's office and trying to explain why you didn't follow the guidelines. You know that's not a nice place to be." GD11 "So whether it's that resour…	Assess for readiness and identify barriers and facilitators Change physical structure and equipment Involve executive boards Fund and contract for the clinical innovation Tailor strategies
		Limited resource settings lead to a culture focused on survival and keeping patients safe, rather than implementing best practice recommendations.				Inner setting - culture: deliverer- and learning-centredness
		When providers have to pay for guidelines or educational resources.				Innovation - cost Individual - innovation deliverers: motivation, capability Inner setting - available resources: access to knowledge and information	Making guidelines free for all care providers (and postpartum families) to access.		Distribute educational materials Fund and contract for the clinical innovation
		Some care providers believe developing living guidelines must be resource intensive (due to the need for ongoing surveillance of evidence).		Living guidelines are actually an efficient way to update guidelines as updates focus on topic areas most likely to change.		Individuals - innovation deliverers motivation (beliefs) Innovation - design, relative advantage (facilitator)
		There is a lack of Medicare rebates for postnatal services, especially in the community. The financial burden certain (often female) GPs face when providing longer PN appointments.				Outer setting - financing Inner setting - work infrastrucutre, incentive systems
		Lack of PBS funding for many contraceptive options.				Outer setting - financing
		The challenges of providing care to families without Medicare.	“So we are just saying if you are probably Caucasian, middle class, have access to money, you're going to do way better than someone who may be, you know, a refugee in accommodation, is flat sharing or whatever, and have no access to money. Like what a different journey they're going to go on. Why can't we provide the same level of care to everybody?” MW09			Outer setting - local conditions Inner setting - culture: human equality-centeredness
	Reducing guideline inconsistencies across Australia	Inconsistencies in recommendations exist across facility, health district and state guidelines. This can lead to confusion for providers who work in multiple facilities or who move to different geographical locations.	"Like at least that's looking at something nationally. I think it's just when it's all individual states, they're not even all joined up in like a national guideline, which blows my mind, really." OB05 "It is such a obviously vulnerable time for women. And yeah, I think if there could be a little bit more consistency in the guidelines and hopefully that would filter down into kind of the care and…	When recomommendations are built into (state) legislation, promoting consistent care practices. Providers who have worked overseas (e.g. New Zealand) have experienced guideline consistency nation-wide as they operate under a single government body. Casual staff who frequently work at different facilities find local guidelines helpful.		Innovation - adaptability Outer setting - partnerships and connections, policies and laws Individuals - innovation deliverers: capability	Embedding guideline recommendations into legislation.		Mandate change Obtain formal commitments Create or change credentialing and/or licensure standards Involve executive boards Alter incentive/allowance structures Develop and organize quality monitoring systems
		When local guidelines do not follow the recommendations of higher level guidelines without an explanation or rationale.		Providers who work in different facilities with different guidelines are more likely to question recommendation inconsistencies (and potentially initiate changes to guidelines).		Inner setting - mission alignment, culture: learning-centeredness Individuals - innovation deliverers: capability, motivation (facilitators) Implementation process - reflecting and evaluating: implementation (facilitator)
		The challenges of implementing a national guideline in a state-based healthcare system: - When multiple guidelines exist on the same topic, providers will likely follow local guidelines and policies as these are what they are accountable to. - The Commonwealth (national) government has a limited role in maternity care, thus national guidelines they fund may have limited impact without significant…	"so if you've got a state guideline that has any conflict with the LEAPP guidelines, I would expect that they would have to go by their state. So alignment and communication so that the states accept LEAPP as the point of truth would have to be, would absolutely have to be in place" GD03 "And in terms of challenges, I mean, I guess it relies on everyone in the unit being committed to using the [n…	A national guideline has the ability to encourage consistency of care across Australia. Having overarching national guidance can help identify gaps to fill in local guidelines. Some guideline inconsistencies are warranted and beneficial when the differences in recommendations are to adaptations made to accommodate contextual factors.	"Why reinvent the wheel? This is why I'm excited about [the LEAPP guidelines], because I think if we could have one standard postnatal, set of postnatal guidelines, it actually would really help with consistency of care. And also you would really eliminate different sites doing so many different things that aren't necessarily based on evidence." FM11 "It [the LEAPP guideline] is so exciting for t…	Outer setting - policies and laws, local conditions Innovation - adaptability, relative advantage Inner setting - mission alignment, work infrastructure, culture: human equality-centeredness, learning centeredness Implementation process - planning, engaging: innovation deliverers, tailoring strategies	1.Incorporating national guideline recommendations into national standards, policies and strategies. 2.During development of a national guideline, ensure there is representation and early alignment with all state and territory governments and peak professional bodies to encourage uptake into sub-national guidelines. 3.Have state/territoy champions to promote and encourage local guideline alignmen…	1. "I think if we had everybody on board to say “yes, that's a nationally recognised guideline that we're all going to operate under”, which let's face it, everybody copies everybody else's guidelines anyway. So we're all doing the same thing essentially, but we just need that somewhere along the line for somebody to say “yes, we're all going to do that. This is the resource that we're going to u…	1.Mandate change Involve executive boards Alter incentive/allowance structures Develop and organize quality monitoring systems 2.Build a coalition Use advisory boards and workgroups Involve executive boards Promote network weaving Use advisory boards and workgroups Conduct local consensus discussions 3. Identify and prepare champions Involve executive boards Promote network weaving Inform local o…
		Guidelines that do not include enough information about implementation often result in different interpretations of recommendations.		When facility managers have networks that share information about how they implementat guidelines, to learn from each other.		Innovation - design, adaptability Inner setting - culture: learning-centeredness, relational connections (facilitator) Individuals - innovation deliverers: capability Outer setting - partnerships and connections	Creating clear standard operating procedures and/or implementation plans to assist to improve consistency of guidelines across facilities. Forming implementation networks to discuss local challenges and strategies used. Learning from others experiences to optimise implementation.		Develop a formal implementation blueprint Develop educational materials Tailor strategies Develop and implement tools for quality monitoring Capture and share local knowledge Promote network weaving Create a learning collaborative
		Having inadequate governance structures for guidelines and their implementation.				Implementation process - planning Inner setting - work infrastructure, culture: learning-centeredness
		Guidelines often lack evaluation of implementation plans.				Implementation process - planning, reflecting and evaluating: implementation Innovation - design Inner setting - IT infrastructure	Performing facility level evaluations of guideline compliance.		Develop and implement tools for quality monitoring Purposely reexamine the implementation Audit and provide feedback Involve executive boards Use data experts
		Private hospitals use guidelines and their resources less. This can result in a drop in consistency of care for individual families when their obstetrician is unavailable (e.g. on leave).				Inner setting - work infrastrucutre, mission alignment Outer setting - policies and laws, financing Individuals - innovation deliverers: motivation
		Private practitioners have to pay for certain guideline resources that are free (government funded) for providers working in the public healthcare system.				Inner setting - work infrastructure, available resources: funding, access to knowledge and information Innovation - cost Individuals - innovation deliverer: motivation
		Private obstetricians and paediatricians all do things differently, this can be difficult for midwives to keep track of.				Inner setting - work infrastructure, communications Individuals - innovation deliverers: capability	Having documentation systems to keep track of various private providers care preferences.		Change record systems Tailor strategies Develop educational materials
		Private patients often have less referrals to community supports after discharge.				Outer setting - partnerships and connections, local conditions Inner setting - structural characteristics, culture: human equality-centeredness Innovation adaptability
		Midwives working in private facilities cannot always work to their full scope of practice.		When midwives are encouraged by private practioners to operate at their full scope of practice.		Inner setting - work characteristics, culture: deliverer-centeredness Individuals - innovation deliverers: opportunity
		Catholic facilities are unable to provide official guidance and documentation about contraception (as is recommended in most postnatal guidelines).				Inner setting - mission alignment, structural characteristics Individuals - innovation recipients: needs Outer setting - local attitudes
		Inadequate data management systems and day-to-day monitoring of guideline compliance. This can be due to inadequate staffing to perform auditing.				Inner setting - work infrastructure, IT infrastructure Implementation process - reflecting and evaluating: implementation	Providing recommendations within guidelines about what data to collect (and the systems to do this) to monitor guideline compliance and effectiveness. This may include having systems to audit medical records, collect and analyse patient outcomes and lived experience surveys.		Develop and implement tools for quality monitoring Develop and organize quality monitoring systems Change record systems Audit and provide feedback Use data experts Involve patients/consumers and family members
	Enhancing guidance for fragmented models of care	Inadequate systems, including handover, for bridging hospital and community based postnatal care.	"It would help in the handover section, to people like the maternal and child health nurse if, because in Victoria they tend to be shire based services as opposed to hospital based services, and it's quite hard to be able to communicate concerns about particular women to them. It's not impossible. But especially at weekends all you're doing is leaving a message on an answering machine or sending …			Outer setting - partnerships and connections Inner setting - relational connections, communications, IT infrastructure	Building relationships between hospital and community care providers within a local area, building understanding of what each group needs and wants from the other to improve care for families.	So I guess for us, it's about educating the midwives about, you know, when they come in doing, you know, getting midwives on their clinical placement to come and do some placement with child and family to understand what happens beyond their service. That as well. MCH10	Promote network weaving Conduct local consensus discussions Tailor strategies Organize clinician implementation team meetings
		Continuity of care models are not accessible to most families in Australia.				Outer setting - local conditions Individuals - innovation recipients: needs Inner setting - structural characteristics, culture: recipient-centeredness
		When continuity of care models are not used it is difficult for providers to understand what education has been covered with families.				Inner setting - work infrastructure, communications, IT infrastructure Innovation - complexity
		Hospital based care providers often do not consider long term postnatal conditions, and do not provide education or referrals for these.	a lot of the systems around Australia now have come into that growing better babies and they're going into that first thousand days of life. But the midwives still stood over here and we discharge the woman. And what happens to them next? And in that six weeks do we readmit? And why don't? Why aren't we saying to the midwives, OK, our scope of practise might six weeks finish, but our interest in …	Having guidelines that include local referral pathways.		Individuals - innovation deliverers: capability and motivation Inner setting - mission alignment, structural characteristics, culture: recipient-centeredness	Having guidelines that include local referral pathways. This should include information about when and why to refer, and what information to include in referrals. Developing guidelines that extend beyond the first 8 weeks to improve provider awareness of longer term postnatal conditions and how to manage or educate families about these in the early days also.	I think one of the problems with the six to eight week cheques is that transition from midwifery care to maternal child health and general care, we struggle with that because we have a lot of women with chronic disease and I can't get our midwives to understand that they need to put a recall in. If this woman had diabetes in pregnancy, put in a GTT for six weeks. But if, but knowing that they're …	Develop educational materials Remind clinicians Promote network weaving Develop educational materials Prepare patients/consumers to be active participants Tailor strategies
		When antenatal, labour and birth staff at a facility are not aware of or in agreement with care practices that affect postnatal care.				Inner setting - mission alignment, relational connections, communications Individuals - innovation deliverers: capability, motivation	Communicating relevant guideline changes with antenatal and birth teams.		Promote network weaving Organize clinician implementation team meetings Conduct educational meetings Conduct educational outreach visits
		When follow up rates after hospital discharge are low, it is challenging to provide all necessary education and health assessments.				Implementation process - engaging: innovation recipients Innovation - complexity
		It is challenging to develop guidelines that consider all models of care, particularly national and state/territory level guidelines.	"I think that that there's kind of two types of postnatal care. So if women, if women are accessing continuity models of care, they're often having their postnatal time in the home. And and I know a lot of our women, even if they don't go through continuity of care, will go home from the birth unit. So they're home. But the women who have medical needs and who need to stay in hospital. And it mig…			Innovation - complexity, adaptability Outer setting - local conditions
		The various postnatal professions tend to operate in siloes, each bring a different lens and different (sometimes misaligned) priorities for care.	"I guess clients understanding that we're two different services, so sometimes the uptake of child and family is not so great with some areas because they think that they've got their midwife. And the maternity service hasn't really explained that they go only to a certain point and child and family will come in. So they keep they say no, I've already got a midwife. So there's that aspect as well…	Having good commuication and relationships between provider groups at a facility or in a local area.		Inner setting - work infrastructure, relational connections, communications Individuals - innovation deliverers: capability	Having systems to monitor which staff have been captured by guideline/education updates.		Develop and organize quality monitoring systems Purposely reexamine the implementation Change record systems
		When different provider groups follow different guidelines with contradicting recommendations.		Having guidelines that cater for multiple professions and disciplines to bring consistency between professions.		Innovation - source, design Inner setting - mission alignment, structural characteristics	Developing multidisciplinary guidelines and promoting them as a resource to encourage provision of collaborative postnatal care. Linking relevant guidelines commonly used by different professions to increase understanding between provider groups. E.g. Linking LEAPP to the GPs E-therapeutic guidelines (and vice versa).		Promote network weaving Develop educational materials Conduct local consensus discussions Promote network weaving Develop resource sharing agreements Remind clinicians
	Opportunities to improve provider education and training	University and specialist training does not adequately prepare care providers for the realities of postnatal care.	"So I find that there is such a disconnect between the ideals that they're teaching at university and what the reality is." FM06			Outer setting - local conditions, partnerships and connections Individuals - innovation deliverers: capability	Include guideline content within relevant university degree curriculums and promote national guidelines as a useful resource for students.		Work with educational institutions Develop educational materials
		Continuing education for maternity providers, such as inservices and conferences, often focus on pregnancy, labour and birth (very little postnatal content).				Inner setting - access to knowledge and information, culture: learning-centeredness Individuals - innovation deliverers: capability	Incentivising education and training sessions that include content from postnatal care guidelines by offering college accredited CPD points for attendance and completion. Present postnatal guidelines and host a stall at relevant clinical conferences.		Alter incentive/allowance structures Create or change credentialing and/or licensure standards Work with educational institutions Develop educational materials Conduct educational meetings Develop educational materials Inform local opinion leaders Promote network weaving
		Certain postnatal topics lack provider resources and training. Providers feel a lack of support and training for complex topics including perinatal mental health and social determinants of health.	"So we all understand that that's [birth trauma] out there now and accepted. I think it's the same how people process their trauma, and we're not all over the understanding of that. Some people will want that information straight after, some people don't. Some people want it later and some people will just want to just pretend it didn't happen until they're pregnant again. So I think there's defi…			Inner setting - access to knowledge and information, materials and equipment Innovation - complexity, evidence base Individuals - innovation deliverers: capability, motivation	Ensure guideline topics and recommendations are meeting the needs/clinical questions care providers have. Develop high quality education and training for care providers that align with guideline recommendations. These could be in person training sessions or online webinars and e-learning platforms.		Conduct local needs assessment Conduct local consensus discussions Tailor strategies Purposely reexamine the implementation Develop educational materials Work with educational institutions Centralize technical assistance
		When faclities do not provide education about guideline recommendations when they change.				Inner setting - communications, access to knowledge and information, IT infrastructure Implementation process - engaging: innovation deliverers, planning Individuals - innovation deliverers: capability	Multiple strategies exist for facilty level guideline education (see theme 5). However, participants were clear that educational initiatives are unlikely to work in isolation to change clinical behaviours.	"Educating is only effective if the person wants to be educated and then they won't take it all on board anyway. We've all got short attention spans. I'm not saying don't educate. Like I teach and I do stuff, but it has to be tailored and it has got a part. But you've really got to have these forcing functions. You have to have buy in from the senior level. Your board has to say this is the proto…	Tailor strategies Assess for readiness and identify barriers and facilitators
		Many facilities cannot afford to bring in external training providers for staff to attend.				Inner setting - availiable funding Outer setting - financing
		Continuing education and training is often expensive for providers to book and attend.				Innovation - cost Individuals - innovation deliverers: motivation	Incentivising continuing edcation for postnatal topics. This could include government funding to attend training sessions for free or to upskill clinicians (helping to keep them in the profession for longer).		Alter incentive/allowance structures Access new funding Work with educational institutions Identify and prepare champions
		Attendance at facility level educational sessions is often sub-optimal.				Inner setting - relative priority, culture: learning-centeredness, work infrastructure Implementation process - engaging: innovation deliverers	Tailoring education sessions to meet the knowledge and skills needs of staff members. Knowledge needs may be ascertained directly from staff or indicated by ongoing monitoring and auditing that reveal areas for clinical practice improvements. Including guideline content in online compliance training if attendance continues to be low (this is a less ideal option as many providers already feel over…		Conduct local needs assessment Audit and provide feedback Tailor strategies Make training dynamic Develop educational materials Create or change credentialing and/or licensure standards Mandate change Work with educational institutions Tailor strategies
		Rural and remote settings often have less resources to provide education.		Rural and remote settings often have a more experienced workforce, so education is more about learning from colleagues as opposed to formal training sessions.		Inner setting - available funding, materials and equipment Outer setting - local conditions, financing Individuals - innovation deliverers: capability (facilitator)	Encourage mentorship and preceptors within clinical workplaces as an informal method of sharing expertise with less experienced staff members.		Identify and prepare champions Inform local opinion leaders Promote network weaving Develop educational materials
		Time and resource limitations limit the implementation of long term education initiatives, such as the Baby Friendly Health Initiative (BFHI).		When facilities do have the capacity to provide ongoing BFHI education and training, this has great benefits for staff knowledge and skill levels.		Inner setting - work infrastructure, available funding, materials and equipment Innovation - design Individuals - innovation deliverers: capability
		Midwives and obstetricians lack guidance about the types and topics for continuing education they should complete.				Outer setting - Policies and laws Inner setting - structural characteristics, mission alignment	Providing guidance to providers about what minimum topics need to be covered in their continuing education for the year. Providing more opportunities and guidance about training for specialised skills, such as birth debrief midwives.		Create or change credentialing and/or licensure standards Develop and implement tools for quality monitoring Develop educational materials Work with educational institutions Identify and prepare champions Develop educational materials Create or change credentialing and/or licensure standards
		There is a lack of recognition for GPs who have a special interest in women's health (unless trained as a GP obstetrician).				Outer setting - local conditions Inner setting - work infrastructure Individuals - innovation deliverers: motivation
		Many GP's lack the education or interest in postnatal care to provide quality care (postnatal care is barely covered in both GP and GP-Obstetrician training).				Outer setting - local conditions Individuals - innovation deliverers: capability, motivation Inner setting - culture: learning centeredness

## Sheet: Theme 5
Theme	Sub themes	Barrier examples	Illustrative quotes	Facilitator examples	Illustrative quotes	Relevant CFIR construct(s)	Strategy examples	Illustrative quotes	Relevant ERIC strategies
Integrating guidelines into clinical practice	Enhancing the culture of guideline use within clinical workplaces	Many care providers find guidelines boring and have little motivation to read them.		Care providers still training (e.g. obstetric registrars) look at guidelines as part of exam training.		Individuals - innovation deliverers: motivation, capability Innovation - design, complexity, relative advantage Inner setting - incentive systems (facilitator)	Develop and disseminate guideline summaries and flow charts to make guidelines more palatable to care providers.		Develop educational materials Distribute educational materials Remind clinicians
		Many care providers believe postnatal care recommendations are unlikely to change (compared to pregnancy and labour/birth recommendations) and so providers do not check for updates frequently.		For some facilities, looking at policies and guidelines to answer clinical questions is part of the culture.		Innovation - relative advantage Outer setting - local attitudes Individuals - innovation deliverers: motivation, capability Inner setting - culutre: learning-centeredness	Ensure facility guidelines are easily accessible and clear communications are sent to all staff whenever changes are made (see themes 2 and 3 for more dissemination strategies). Ensure guidelines have recommendations about topics and clinical practices that providers want and/or need guidance for.		Distribute educational materials Change physical structure and equipment Conduct local needs assessment Tailor strategies Purposely reexamine the implementation
		When health service executives, managers, and/or care providers are not on board or commited to making changes.		Having health service executives, managers and care providers on board with guideline changes.		Inner setting - mission alignment, relative priority Individuals - mid- and high level leaders, implementation leads, opinion leaders, innovation deliverers: motivation	Guideline developers seeking feedback on guideline updates from care providers, managers and health service executives. Establish a multidisciplinary committee to discuss and plan for changes before they are implemented.		Involve executive boards Conduct local consensus discussions Tailor strategies Organize clinician implementation team meetings Develop a formal implementation blueprint Promote network weaving Conduct local consensus discussions
		Some providers lack a desire to improve their practice and are less inclined to stay up to date with evidence/guidelines. The challenge of engaging the disengaged portion of the workforce and providers not interested in keeping up to date with the latest evidence.	“It's about encouraging people to be proud of what they do and ensuring that they meet the needs of each individual person that are in their care. So it's about engaging their personal drive to be practicing and that's really tricky because to some extent the way that we manage hospitals and facilities is always dumbing it down to the lowest common denominator, so we're not inspiring people to be…	When providers are personally motivated to keep up to date and implement change.		Individuals - innovation deliverers: motivation, capability Inner setting - culture: learning-centeredness Implementation process - engaging: innovation deliverers	Plan dissemination strategies about guideline changes to reach the majority of staff, focusing on those who are likely to be receptive to change. Embedding recommendations into workflows, medical records, postnatal care plans. This helps to overcome disengaged and change resistant cultures as it makes doing evidence-based practices the path of least resistance. Engaging providers to have a desire…	“It [having checklists within medical records] can't be, can't be too sterile. It needs to have some option or demonstrating that you, that we've looked at this woman as an individual. But in the, you know, balancing all the needs and ensuring that they're addressed” OB05	Identify and prepare champions Identify early adopters Develop a formal implementation blueprint Inform local opinion leaders Tailor strategies Change record systems Develop and implement tools for quality monitoring Change physical structure and equipment Remind clinicians Create a learning collaborative Facilitation Obtain and use patients/consumers and family feedback Promote network weaving R…
		Care providers lack the time to identify and read guidelines.		Care providers working in community settings are less rushed and have more time to look into guideline changes and assess the evidence.		Inner setting - work infrastructure, IT infrastructure Individuals - innovation deliverers: motivation, capability, opportunity
		Recommendation compliance can vary depending on how "critical" a recommendation appears to be. Recommendations that providers believe will have a meaningful clinical impact are more likely to be adhered to.				Innovation - relative advantage, design Individuals - innovation deliverers: motivation, capability Inner setting - relative priority	Prioritising implementation efforts according to the clinically important changes they are expected to yield.		Tailor strategies Develop a formal implementation blueprint Conduct local needs assessment Involve executive boards
		Stressful workplace environments (e.g. high volume and turnover of patients, low staffing and resources) can lead to a survival culture where less clinically critical recommendations are de-prioritised or ignored.	"So some hospitals I’ve worked out that have less funding and resources. The culture is very much about survival and trying to make sure that they are safe, as safe as you can possibly keep them within the constraints of that system." OB04			Inner setting - work infrastructure, available resources, culture: recipient-centeredness Individuals - innovation deliverers: motivation, capability
		More experienced providers can be stuck in their ways and more willing to override guideline recommendations with their clinical judgement.		Having champions and/or senior staff who model desired behaviours. Clinicians who have had past (sometimes negative) experiences with a certain condition are then more likely to become informed on guidance.		Individuals - innovation deliverers and opinion leaders: capability, motivation Implementation planning - engaging innovation deliverers (champions)
		Care providers who are resistant to change.	"And then all the problems of any implementation is that people like to do things the way they've always done things, change is difficult." GD09	Team culture has an eagerness to learn and are receptive to change. Staff respect what guidelines and policies say.	"I also have to say though, I have a very good team that's very, very receptive to new information and change." FM11	Individuals - innovation deliverers: motivation, capability Inner setting - culture: learning-centeredness Implementation process - engaging: innovation deliverers	Communicating the benefits changing practice will have for the staff themselves and for postpartum people and babies.		Alter incentive/allowance structures Conduct local consensus discussions Facilitate relay of clinical data to providers
		When changes to recommendations and policies occur too frequently this can result in change fatigue and providers feeling overwhelmed. Some providers expressed this concern in relation to living guidelines.		In reality, living guidelines rarely "flip-flop", that is they rarely change from recommending a practice to not recommending a practice. Instead, it is more common for the strength of evidence for a recommendation to change.	"In terms of change, it's actually very uncommon for the recommendation to change to say something we said don't do it, now do do it, or vice versa. It's more common... for the strength of that recommendation to change...now we're more confident this is an evidence-based recommendation. But the change of direction is very rare. So, it's a completely valid question and one that we asked ourselves …	Innovation - design, complexity Inner setting - culture: learning-centeredness Individual - innovation deliverer: capability
		It is less common to use clinical guidelines and their resources in private facilities.	So the private obstetricians and the private paeds will sometimes completely disregard the policy of our hospital. And I used to be an after hours manager. So it's quite, sometimes very challenging to remind them that the guideline is that we don't put a Bakri in on in a birth suite. We need to take that woman to theatre even though you're trying to just do that because you don't want to scrub up…	Public hospitals are more likely to follow guideline recommendations.		Inner setting - work infrastrucutre, mission alignment Outer setting - policies and laws, financing Individuals - innovation deliverers: motivation
		The stigma surrounding poor mental health (particularly during pregnancy and postpartum) remains more so in the private healthcare sector. Screening for depression and anxiety is not routine (as it is within the public system). This may be because private providers have to pay for the screening tools (not funded by the government).				Outer setting - local attitudes, financing Innovation - cost Inner setting - culture: human equality-centeredness Individuals - innovation deliverer: motivation
				Having staff members who are willing to question others clinical decisions or guideline recommendations (in a non-confrontational way).		Inner setting - culture: learning centeredness, relational connections, communications Individuals - innovation deliverers: capability, motivation
		When guidelines are strictly adhered to at the detriment of individualised care. This can occur when care providers lack the skills to interrogate evidence.		Providers with the ability to interrogate and interpret the evidence to decide when individualised care options (not indicated in the guideline) are preferrable. Remembering that guidelines are just a guide. Clinical judgement, common sense and experience are also important – however this may lead to inconsistencies in practice.		Individuals - innovation deliverers: capability Innovation - adaptability, design Inner setting - culture learning-centeredness	Organising hospital journal clubs to share knowledge in an accessible format and to develop care providers evidence interrogation skills.		Develop educational materials Conduct educational meetings Create a learning collaborative Conduct local consensus discussions Promote network weaving
	Utilising clinical systems to drive guideline adoption	When it is difficult to update or amend local guidelines to reflect higher level guidelines. Multiple rounds of approval required from different interested parties.		Having local guidelines that have been designed for, or adapted from higher level guidelines, to reflect the local context.	"But then you had to adapt it to the context. So it's not possible to say that you can do this and that if you're living in a community that's 1000 kilometres away from your Tertiary centre. There's no night airstrip. There's no midwife there. Nurses are going to have to provide this care so that then the actual national guideline gets tailored, and that's the best practice work with guidelines. …	Inner setting - structural infrastructure, compatability Innovation - adaptability Implementation process - planning, adapting	Streamline processes for integrating recommendations from trusted national or state/territory guidelines into local guidelines.		Develop a formal implementation blueprint Create or change credentialing and/or licensure standards Involve executive boards Mandate change Promote network weaving
		When changes to policy or guideline recommendations are rushed.		When changes to policies and guidelines are not rushed.		Implementation process - planning, engaging: innovation deliverers	Prioritising recommendations and changes to implement based on clinically important changes to practice.		Tailor strategies Develop a formal implementation blueprint Conduct local needs assessment Involve executive boards
		Facilities who are paper based may be slow to translate recommendations. This is considered particularly problematic if living guidelines make frequent changes.				Inner setting - IT infrastructure, available materials and equipment, compatability
		When a facility does not have a staff member responsible for maintenance and updates of guidelines.		Facilities that have a policy officer responsible for guideline development and updates.		Inner setting - work infrastructure, culture: learning-centeredness Implementation process - planning, reflecting and evaluating: innovation
		Facility bans printed or downloaded versions of guidelines and policies . This ensures outdated versions are not used, however many providers find printed summaries and flow charts helpful for quick referral.		Hard copies of guidelines often allowed in rural and remote areas with poor internet connectivity.		Inner setting - physical infrastructure, IT infrastructure Innovation - design, complexity Individuals - innovation deliverers: capability
		Encountering technical difficulties with changes to systems.				Inner setting - IT infrastructure
				Facilities that utilise clinical midwife consultants and educators.		Inner setting - work infrastructure, access to knowledge and information Individuals - implementation facilitators, leads, and team members: opportunity
		Smaller facilities (often rural and remote) have less resources to implement frequent education sessions.		Large facilities often have frequent education sessions. This is necessary due to high staff turnover (this in itself is a barrier).		Inner setting - available funding, materials and equipment Outer setting - local conditions, financing Individuals - innovation deliverers: capability	Initiating ongoing staff education systems that may include: - Inservices at handover time / double staff time. - Recorded presentations posted to staff intranet that can be watched at anytime. - Short, informal education sessions. - Experiential, skills training and giving ongoing opportunities to practice skills. - Short video updates. - Journal clubs. - Face to face or online self paced traini…		Conduct ongoing training Make training dynamic Develop educational materials Distribute educational materials Tailor strategies Conduct educational meetings Organize clinician implementation team meetings Centralize technical assistance Create a learning collaborative Create or change credentialing and/or licensure standards Change record systems
		The challenge of ensuring all members of larger clinical teams receive guideline updates and education.		Smaller teams make it easier to ensure everyone is aware of recommendation changes.		Inner setting - relational connections, work infrastructure Implementation process - engaging: innovation deliverers	Utilise systems to monitor which staff have attended education or training sessions, or who have completed a skills competency sign off. Having clinical educators follow up with staff after changes are made and offering continued support. Checking that the most important points/changes have been clearly communicated. Having managers remind staff about guideline or policy updates multiple times, e…		Change record systems Develop and organize quality monitoring systems Audit and provide feedback Purposely reexamine the implementation Provide ongoing consultation Audit and provide feedback Purposely reexamine the implementation Remind clinicians Provide ongoing consultation Audit and provide feedback Purposely reexamine the implementation Organize clinician implementation team meetings
		People in positions of power change every 5-10 years, managers have to rebuild rapport and trust.	"years ago, I think there was more engagement. I think it's become a little bit more segregated, but that's probably a structural issue in our local health district and hospital at the moment rather than anything. But these things change every five to 10 years anyway. So you know what the managers or the the people in charge you know five years ago aren't going to be the same in the same at the s…	Having good quality relationships and communication between executives and managers, managers and providers, and between providers (including different types of providers). Good relationships can develop: - Over time with consistent efforts. - With collaboration in smaller, often rural workplaces.		Inner setting - relational connections, communications Individuals - mid- and high- level leaders: opportunity, innovation deliverers: motivation
		Workplaces that don't provide the opportunity for staff to learn from colleagues.		Mentorship and preceptorship models are used.		Inner setting - relational connections, communications Individuals - opinion leaders and innovation deliverers: capability, opportunity Implementation process - reflecting and evaluating: implementation
		Inadequate data management systems and day-to-day monitoring of guideline compliance. This can be due to inadequate staffing to perform auditing.				Inner setting - IT infrastructure, work infrastructure Implementation process - reflecting and evaluating: implementation, planning	Monitoring and reporting processes and outcomes for guideline care practices. Monitoring processes may include: - Having systems for auditing medical records, patient outcomes, feedback from staff and patients. - Collecting and analysing data that shows effectiveness of guideline. - Investigating breaches and using incident reports and escalating. Reporting may include: - Providing both positive …		Audit and provide feedback Use data experts Develop and implement tools for quality monitoring Develop and organize quality monitoring systems Purposely reexamine the implementation Obtain and use patients/consumers and family feedback Audit and provide feedback Purposely reexamine the implementation Provide ongoing consultation Organize clinician implementation team meetings Tailor strategies De…
				When guideline recommendations are built into medical records and care plans (making them the path of least resistance).		Innovation - design, complexity Inner setting - IT infrastructure Individual - innovation deliverer - capability	Embedding guideline recommendations into workflows, medical records and postnatal plans, this may include: - Embedding best practice recommendations into service workflows (e.g. mental health screening) - Embedding recommended referral pathways into workflows. - Havings evidence based escalation pathways and systems for high risk patients. - Inserting links to guidelines in relevant sections of m…	it's making it easy for people to do the right thing.So going through the structures within, you know this works, particularly in the big public hospitals that, you know, your paperwork leads people in the right direction and you know, make it easy to do the right thing rather than do the thing you've always done. But of course we get so tied up in our paperwork that people can't find the new thi…	Change record systems Change physical structure and equipment Develop and implement tools for quality monitoring Remind clinicians
	Implementing changes in understaffed and fast paced environments	The average length of stay on postnatal wards has decreased without any meaningful increases to care provided in the community setting. Time pressures to discharge women quickly make it difficult to comprehensively follow guideline recommendations, particularly around family education. Time pressures were reported most commonly in metropolitan tertiary settings.	"I felt like I was trying as hard as I could, but because the public health system's the way it is and the fundings the way it is like there just weren't beds and so often you know, women have to leave, but you probably feel like they would benefit from a lot more education or care” MW07 “The chances are you're going to be looking after a woman and family you've not met before, and so you've got …	Private facilities and services in rural environments generally allow longer length of stays in the postnatal ward and as a result providers feel they can deliver more comprehensive education and support to families.		Outer setting - local conditions, financing Inner setting - work characteristics, available resources Individuals - innovation deliverers: motivation	Developing and distributing engaging, evidence-based educational resources for postpartum people and families. This can take some pressure off of midwives to comprehensive cover all recommended educational components in person.		Develop educational materials Distribute educational materials Obtain and use patients/consumers and family feedback Prepare patients/consumers to be active participants
		High levels of staff burnout and low job satisfaction have led to many providers (particularly midwives) leaving the profession. This in turn has contributed to understaffed postnatal wards.	"I think also there's a huge amount of burnout, particularly amongst, my medical colleagues, but also my midwifery colleagues. We have like a high volume of people working double shifts and working overtime to try and keep up with the volume of the patients that we have coming in. And I think when you have a system that's structured by people creating band aid solutions to like a systemic problem…			Individuals: innovation deliverers: motivation, capability Inner setting - work infrastructure
		Short hospital length of stay means there is only a small window for complications to crop up. This can lead to more readmissions and emergency department visits.				Outer setting - local conditions, financing Implementation process -assessing needs: innovation recipient
		As the length of stay in hospitals has declined, referals for acute conditions has greatly increased (e.g. lactation consultants). This could be seen as a barrier or facilitator depending on the preferences of the postnatal person.				Outer setting - partnerships and connections, local conditions Innovation - design
		Visitors on the postnatal ward further limits the time women are available for care and education.	"One of the wonderful things that happened during covid was that we had more time with women because there were no visitors. We are now back to visitors coming all day, this severely limits the time we can spend with women" MW02	Policies introduced to restict visitors on postnatal wards during the Covid pandemic increased providers time wih, and ability to educate and support postpartum people.		Inner setting - structural characteristics, relative priority, culture: recipient-centeredness Individuals - innovation recipient: motivation, innovation deliverer: capability, opportunity
		High patient to midwife ratios, particularly in busy metropolitan tertiary settings. Babies usually not counted as a patient, even when they have complex needs.	"like you're not, you're just barely ticking all the boxes, making sure everyone's okay before the morning. Like, you can't give quality care, I think that's adds to burnout as well and dissatisfaction with the job." MW11	Facilities that do include babies in patient acounts, providing additional staffing to postnatal ward.		Inner setting - work infrastructure Outer setting - financing, local conditions Innovation - complexity	Instigating policies to count babies (or at least babies with complex needs) in the calculation to determine staff to patient ratios.		Involve executive boards Fund and contract for the clinical innovation Revise professional roles Use other payment schemes Tailor strategies
		Care providers lack the time to read guidelines or interrogate the evidence.		Community setting less rushed, care providers have more time to look into guideline changes and assess evidence. Facilities that allocate study days for providers to look at the latest evidence and guidance.		Inner setting - work infrastructure, access to knowledge and information, relative priority (facilitator) Individuals - innovation deliverers: capability, opportunity Innovation - design	Guideline developers including summaries of recommendations, flow charts and decision trees to help providers find information quickly. These should be easy to find within the guideline, for example at the start of the guideline. Facility managers sharing the most important updates and changes to local guideline recommendations with staff via email, recorded presentations, and in ward meetings. A…		Develop educational materials Change physical structure and equipment Remind clinicians Tailor strategies Organize clinician implementation team meetings Centralize technical assistance Distribute educational materials Create or change credentialing and/or licensure standards Develop educational materials Develop educational materials Create a learning collaborative Conduct local consensus discus…
		Care providers lack the time to learn and practice new clinical skills.				Inner setting - work infrastructure, access to knowledge and information, relative priority Individuals - innovation deliverers: capability, opportunity
		Care providers, especially midwives, have an increasing number of tasks to perform in a limited amount of time.	"Like two nights after caesarean and one night, regardless of the type of vaginal birth that you've had. And there's so much to cover and it's so busy. It's brutal. I mean, I'm sure it influences breastfeeding rates. Like they're just in and out, like they're on a conveyor belt. I feel like it's way too fast." MW11			Inner setting - work infrastructure Innovation - complexity, relative advantage Individuals - innovation deliverers: capability, opportunity	Managers prioritising guideline recommendations and changes to implement so as not to overwhelm staff. Prioritisation might be based on the expected change to clinical outcomes or improvements to workflows.		Tailor strategies Develop a formal implementation blueprint Conduct local needs assessment Involve executive boards
		Given the time pressures on postnatal wards, providers prioritise physical assessments over subjective assessments and education of families.				Inner setting - relative priority, work infrastructure, compatability Innovation - relative advantage, complexity Individuals - innovation deliverers: capability, motivation
		There is a lack of time for experienced staff to share knowledge with less experienced staff members.				Inner setting - relational connections, communication, work infrastrucutre, access to knwledge and information Individuals - innovation deliverers, opinion leaders, implementation facilitators: capability, motivation
		Not having enough staff to perform non-clinical roles such as auditing or guideline updates.		Having a policy officer responsible for guideline development and updates.		Inner setting - work infrastructure, IT infrastructure, relative priority Implementation process - reflecting and evaluating: implementation Individuals - other implementation support: opportunity	Utilising other trusted guidelines, to develop or update local facility guidelines.		Promote adaptability Tailor strategies Develop resource sharing agreements Develop educational materials Promote network weaving
		Registered nurses being used to fill the midwifery gap, despite nurses not having any specific maternity care training.				Inner setting - work infrastructure, structural characteristics Individuals - innovation deliverers: capability, motivation Outer setting - local conditions
		Care providers in rural areas working outside of their scope of practice to fulfill families needs.				Outer setting - local conditions Inner setting - work infrastructure, culture: recipient-centeredness Individuals - innovation deliverers: capability, motivation
		When travel time for home visits is not considered when calculating daily patient load. This limits the time midwives/nurses have to spend with postpartum families.	"Everything revolves around funding, you know. So in an ideal world, I would like to be able to do home visits for a bit longer with the woman, and I would certainly like to be able to spend more time with her. Um, you know, a lot of hospitals have got an hour and a half in the afternoon to do all their visits, and if you live rurally, you haven’t even done your driving in that hour and a half. S…			Inner setting - work infrastructure, structural characteristics Outer setting - local conditions, financing
		High levels of staff turnover. A high proportion of facility manager or clinical educators time goes towards orientating new staff members.		High staff turnover can be common in most geographical settings, however metropolitan hospitals are usually better resourced to provide frequent education to orientate new staff members compared to rural and remote facilities. High staff turnover and use of agency staff can bring fresh perspectives to a workplace.		Inner setting - work infrastructure, relative priority Implementation process - planning, engaging: innovation deliverers, implementation leads and facilitators
		Workforce gaps in rural and remote regions mean that postpartum people and babies go without quality care.				Outer setting - local conditions Inner setting - work infrastructure Individuals - innovation recipients: need
		GPs who decide to provider longer appointments for postnatal patients face a financial burden.				Outer setting - financing, local conditions Inner setting - culture: recipient-centeredness Individuals - innovation deliverers: motivation
	Leveraging the use of guidelines for a less experienced workforce	Many senior / more experienced postnatal care providers have left the profession in recent years (especially during/after the Covid pandemic), leaving a less experienced workforce.		Teams that still have a relatively high proportion of experienced care providers and utilise their skills for the benefit of patients and teaching less experienced staff. Rural facilities often have a higher proportion of experienced providers.		Inner setting - work infrastructure, access to knowledge and information Implementation process - engaging innovation deliverers Individuals - implementation facilitators, innovation deliverers: capability, motivation
		Less experienced staff are lacking the support they need to learn and become proficient. More experienced providers lack the time to share their knowledge with less experienced team members.	"They're not equipped. They don't know what it’s like to have a baby and then coming in and being very moulded by some not so great midwives who have been in here far too long and are burnt out and really need to leave." FM06 "I think it's [having a national postnatal guideline] exciting. It's something that I certainly would advocate and push for. And like I said, it's exciting for our midwifery…	Less experienced care providers are often eager to learn and progress.		Inner setting - relational connections, communication, work infrastrucutre, access to knwledge and information Individuals - innovation deliverers, opinion leaders, implementation facilitators: capability, motivation	Facilities encouraging mentorship and preceptorship (either informal and formal programs).		Develop academic partnerships Create a learning collaborative Provide ongoing consultation Identify and prepare champions Inform local opinion leaders
		In large tertiary facilities junior staff (sometimes students) are often expected to do most of the education of postpartum people and families, despite having less experience.	that [education] has been task shifted to midwifery students, which I find outrageous. They don't have the experience. They do not have, I mean, you cannot learn breastfeeding in a textbook. You have to put in the hours as a clinical midwife, observing breastfeeds. Watching the outcomes of those breastfeeds, you cannot do that as a midwifery student. FM01			Inner setting - work infrastructure, culture: deliverer-centeredness Individuals - innovation deliverers: capability, motivation
		With a less experienced postnatal workforce overall, more ward managers are going into the role with less experience compared to previous generations.				Inner setting - work infrastructure, culture Individuals - mid-level leaders, implementation leads: capability, motivation
		Certain aspects of postnatal care are difficult to acquire knowledge and skills through university and continuing education (e.g. identifying and supporting those that have experienced their birth as traumatic). It can take years of experience with guidance to become proficient in these aspects of care.		Having team members with specialised roles, such as birth (trauma) debrief midwife. Care providers who have had past (sometimes negative) experiences with a certain postnatal condition are often more likely to become informed on guidance for that condition.		Individuals - innovation deliverers: capability, motivation Inner setting - work infrastructure, access to knowledge and information, culture: learning-centeredness Innovation - complexity, adaptability	Introduce systems to help care providers identify clinicians on the ward/local area that specialise in certain aspects of care and are available to answer questions and provide guidance. Advocating for government funding to upskill providers to keep them in their profession for longer (providing free training). Facilities encouraging mentorship and preceptorship (either informal and formal progra…		Identify and prepare champions Centralize technical assistance Promote network weaving Provide local technical assistance Provide ongoing consultation Access new funding Alter incentive/allowance structures Create or change credentialing and/or licensure standards Develop academic partnerships Create a learning collaborative Provide ongoing consultation Identify and prepare champions Inform local…
		More experienced providers are less likely to refer to guidelines and are more likely to make care decisions based on their experience or "gut feeling". Experienced providers may not want to receive guideline updates on basic postnatal concepts and clinical practices.	"What I find is that every midwife has their own methods of practice. And you know, with years of service, years of experience, you do learn a few tricks and sometimes people don't use the guidelines stringently. And I personally, I'm kind of probably at that stage of my career where I kind of go, I think I know what I'm doing around this and the guideline is a guideline. It's not. It doesn't hav…	Less experienced providers and those still in training refer to guidelines more frequently. This is overall a positive, unless guidelines are followed rigidly without consideration to clinical judgement and individualised care options.		Individuals - innovation deliverers and opinion leaders: capability, motivation Implementation planning - engaging innovation deliverers Inner setting - culture: learning-centeredness	A national guideline focussed on "normal" postpartum provides an opportunity for consistent guidance for a less experienced workforce that needs support. Guideline dissemination strategies should tailor the type and amount of updates sent based on profession and level of experience.	"I think it's [having a national postnatal guideline] exciting it's exciting for our midwifery future because I think they need a lot more support than ever. We don't have that same level of expertise anymore... And I think I'm sad for where midwifery is at the moment, so I look forward to seeing some changes and, you know, encouraging more people into the profession by having, you know, good sup…	Develop educational materials Develop and implement tools for quality monitoring Create or change credentialing and/or licensure standards Tailor strategies Distribute educational materials
		Many GPs lack expertise (and interest) in postnatal care as postnatal care is not covered in depth during GP training. In metropolitan settings these GPs sometimes refer patients to other GPs in their clinic.	I can tell you with certainty that there is very minimal postnatal education provided and particularly minimal, if any, lactation education provided as well. So really, anybody who's got an interest in lactation medicine has to go out and do it themselves because within medical training it just doesn't exist. GPO06	GPs working in rural areas often develop a broad postnatal skillset quickly due to exposure to postnatal patients without as many options for referring them elsewhere.		Outer setting - local conditions Individuals - innovation deliverers: capability, motivation Inner setting - culture: learning centeredness, relational connections
				Providers who are also parents feel they have an enhanced understanding of the postnatal experience and this influences their care delivery.		Individuals - innovation deliverers: motivation, capability

## Sheet: Theme 6
Theme	Sub themes	Barrier examples	Illustrative quotes	Facilitator examples	Illustrative quotes	Relevant CFIR construct(s)	Strategy examples	Illustrative quotes	Relevant ERIC strategies
Responding to lived experiences with person-centred guidelines	Using novel approaches to enhance access to postnatal services and resources	There are long waitlists for many postnatal services particularly under the public health system.				Outer setting - local conditions, financing, external pressure Inner setting - compatability Innovation - relative advantage, adaptability Implementation process - assessing context Individuals - innovation recipients: need	Consider the timing of delivering educational components of care. Spreading education into small segments throughout hospital stay can assist in recall and be less overwhelming to new parents.		Tailor strategies Distribute educational materials Involve patients/consumers and family members Prepare patients/consumers to be active participants
		There is a lack of various postnatal services especially in rural and remote settings.				Outer setting - local conditions, financing Inner setting - compatability Innovation - adaptability Implementation process - assessing context Individuals - innovation recipients: need
		Birthing people from rural and remote regions are often advised to birth in regional or metropolitan settings if they have any medical complexities. This means spending their early postpartum period away from social supports.		Rural facilities that offer birthing people with some complexities the opportunity to birth locally. These facilities are partnered with tertiary facilities that provide real time video guidance as needed, with the ability to transfer when appropriate.		Outer setting - local conditions, financing, partnerships and connections (facilitator) Inner setting - compatability, culture: human equality-centeredness, relational connections, IT infrastucture (facilitator) Innovation - adaptability, relative advantage (facilitator) Implementation process - assessing context Individuals - innovation recipients: need	Rural facilities forming partnerships with tertiary facilities to provide real time guidance as needed, supporting more birthing people from rural areas to remain close to home and social supports during birth and early postpartum.		Promote network weaving Develop resource sharing agreements Centralize technical assistance Provide clinical supervision Provide local technical assistance
		Timely access to postnatal care is difficult in rural and remote environments.				Outer setting - local conditions Innovation - adaptability Individuals - innovation recipient: need
		When families live far from health services (rural and remote), attendance and follow up rates are often lower.	"And I think the other thing is as well, you know, sometimes it's the whole trust thing. They can trust us for their pregnancy. But once they've had that baby, they feel like they're free. They want to go back. The baby's healthy, born, and they're just gone. They're gone back to country, gone back to their family." FM12			Outer setting - local conditions Innovation - adaptability Individuals - innovation recipient: need
		Maternal and child health attendance steadily declines after the first 2-3 appointments.		In some regional and rural environements, maternal and child health appointments will include the infants immunisations. This increases attendance rates.		Individuals - innovation recipients: needs, motivation Innovation - relative advantage Inner setting - structural characteristics (facilitator)	For areas experiencing low follow up rates for maternal and child health appointments, consider introducing infant immunisations into regular milestone appointments. This incentivises parents to attend and saves them from booking and attending a second apppointment.		Conduct local needs assessment Tailor strategies Change physical structure and equipment Involve patients/consumers and family members
		Many postnatal services are not included under Medicare or only receive a small rebate. Many families cannot afford to attend such services.				Outer setting - financing, local conditions Individuals - innovation recipients: need, motivation Innovation - relative advantage, cost
		Many postpartum families lack an awareness of the various services available to them. This is especially true for mental health and social support services.				Individuals - innovation recipients: needs, capability Implementation process - engaging: innovation recipient, planning Innovation - design	Guidelines including, or linking to, a directory of postnatal services. Giving women and families self assessment resources (e.g. mental health screening questionnaire) prompting follow up with health professionals when appropriate. Promoting the importance of postnatal care and support to families and communities. In First Nations communities, providing information about the importance of ongoin…	"The thing is that if their elders tell them that they have to be there at a certain time and a place, then they've gotta be there. It doesn't matter where they're at in their pregnancy, what's going on, what's happening. They will drop everything to be there for their family because that's their cultural responsibility." FM12	Centralize technical assistance Promote network weaving Develop educational materials Prepare patients/consumers to be active participants Develop and implement tools for quality monitoring Remind clinicians Involve patients/consumers and family members Prepare patients/consumers to be active participants Inform local opinion leaders Tailor strategies
		A lack of quality interpreter services for families whose first language is not English.	“So we are just saying if you are probably Caucasian, middle class, have access to money, you're going to do way better than someone who may be, you know, a refugee in accommodation, is flat sharing or whatever, and have no access to money. Like what a different journey they're going to go on. Why can't we provide the same level of care to everybody?” MW09	Having multilingual staff members who can assist with translation for families.		Outer setting - local conditions Inner setting - culture: available resources, human equality-centeredness Individuals - innovation recipients: needs, capability
		The cost of antenatal education limits families access to some preliminary education about the postnatal period.		Families who are able to attend antenatal education are often more prepared for their postnatal experience.		Individuals -innovation recipients: capability, motivation Outer setting - financing, local conditions Innovation - cost	Local facilities organising and facilitating peer led education groups that start during pregnancy and continue through the postpartum period for ongoing support.		Involve patients/consumers and family members Prepare patients/consumers to be active participants Develop educational materials Develop academic partnerships Inform local opinion leaders
		Providers feel there is a lack of good quality educational resources for postpartum families, especially resources that are: - Available in multiple languages - Culturally sensitive - Gender inclusive		When guidelines link to useful resources to share with parents. Baby health book (e.g. Green book) with birth information and maternal child health appointments contain useful information in digestible amounts (however information is about infant only).		Inner setting - available resources Innovation - design, adaptability Individuals - innovation recipients: capability	Developing or linking to educational resources within guidelines that are: - Translated into multiple languages - Are culturally sensitive - Use lay language - Have pictorial representations of resources (e.g. posters and brochures) Evaluating the usability and usefulness of consumer resources. Ensuring fidelity of consumer resources to guideline recommendations.		Tailor strategies Develop educational materials Obtain and use patients/consumers and family feedback Centralize technical assistance Obtain and use patients/consumers and family feedback Develop and implement tools for quality monitoring Purposely reexamine the implementation Use data experts Tailor strategies Develop and implement tools for quality monitoring Purposely reexamine the implementat…
		Some providers feel that when paper based educational resources (brochures, booklets) are distributed to families, these are often ignored or thrown out without reading. Other providers questioned whether or not online educational resources shared via QR codes and website links are utilised by families. These resources will not be accessible to those without smart phones.	"I think it's a really difficult time to give information, so it can be helpful to be written down. But I think that probably a lot of people get a bag full of brochures and just chuck them in the bin." MW07 "So I just think you've all these tick boxes on your pathway and you can be saying you're giving it, but whether or not the person is ready to receive it. I just think it's too rushed, I thin…	Some providers felt that sharing resources online (using QR codes and website links) are more likely to be useful to the generation of people giving birth now who are more familiar with technology.		Innovation - design, relative advantage Individuals - innovation recipients: capability, needs, opportunity Inner setting - available resources: materials and equipment, IT infrastructure	Providing options to families on how they would like to receive educational resources (paper based or online). Providing educational resources on an app that is linked to medical appointments, making various resources available at relevant times during pregnancy and postpartum. Developing a consumer version of guidelines, free for all to access online.	One way doesn't work with everyone and we have to have a multi-pronged approach and I think the important thing is also not just communicating with members, whether they be midwifery, college members, or our members. It's communicating with women because ultimately practice changes when the woman in front of you says “this is what the guideline says. This is what should be happening. Why are you …	Tailor strategies Develop educational materials Obtain and use patients/consumers and family feedback Prepare patients/consumers to be active participants Change physical structure and equipment Develop educational materials Prepare patients/consumers to be active participants Change physical structure and equipment
		With the shorter length of stay on the postnatal ward, postpartum people and families often do not feel ready to receive vast amounts of information so soon after birth.	"There are definitely lots of different little brochures and things and you know, amazing breastfeeding booklets and some resources that are probably great. I think a huge problem is that, you know, you go you sign up to the hospital and you get a bag full of brochures and then you have your baby. And you know, you're probably like, haven't slept for a few days like this huge thing has just happe…	Providers who have access to good quality resources to share with patients feel less pressure to cover all educational content during short hospital length of stay.		Individuals - innovation recipients: capability, needs Inner setting - work infrastructure, aavailable resources Innovation complexity	Consider the timing of delivering educational components of care. Spreading education into small segments throughout hospital stay can assist in recall and be less overwhelming to new parents. Identifying or developing high quality educational resources to share with postnatal families to decrease the pressure to comprehensively cover all educational components in person.		Tailor strategies Distribute educational materials Involve patients/consumers and family members Prepare patients/consumers to be active participants Develop educational materials Distribute educational materials Obtain and use patients/consumers and family feedback Prepare patients/consumers to be active participants
		Excessive wait times to access regular GP means many postpartum people are forced to see a GP they are unfamiliar.	"But one thing that we need to be careful about is fragmentation of care, because we know that we get better outcomes with continuity, and I think particularly in a postnatal context where you don't just have one person, you have two people. Having established relationships with family doctors and GPs is really important, but we do need to have the resources for them to be supported as well." GPO…			Outer setting - local conditions, financing Inner setting - relational connections, culture recipient-centeredness Individuals - innovation recipients: motivation, innovation deliverers: capability
		Families have limited access to models of care they desire, especially those that provide continuity of care.		Facilities that are offering more opportunities for families to be cared for under continuity of care models.		Outer setting - local conditions, financing Individuals - innovation recipients: needs Inner setting - structural characteristics, relational connections, culture: recipient-centeredness
		When families who are keen to have an early hospital discharge have to wait significant amounts of time for certain providers to become available or to leave without all recommended assessments.				Inner setting - structural characteristics, work infrastructure Implementation process - planning Individuals - innovation deliverers: motivation, opportunity, innovation recipients: motivation
		Private patients can receive less referrals to community supports after hospital discharge.				Outer setting - partnerships and connections, local conditions Inner setting - structural characteristics, culture: human equality-centeredness
		Support from healthcare services declines significantly after hospital discharge. As a result longer term postpartum conditions and follow up for acute complications are lacking (e.g. cardiovascular health check ups for those who experienced pre-eclampsia). Providers (especially midwives) felt they lack guidance for managing or making referals for long term conditions.	"You know, there's nothing. There's nothing for mums, there's nothing for women. And it stops after six weeks and it's ridiculous." GP03	Continuity of care models assist with long term follow up of complications arising during pregnancy or birth.		Outer setting - local conditions Inner setting - relative priority, work infrastructure Individuals - innovation deliverers: capability, motivation, innovation recipients: need
	Developing acceptable recommendations for postpartum families	When there is low acceptance of recommendations by postpartum people and families.		When guidelines demonstrate the the importance of individualised, respectful care they are more likely to be acceptable to postpartum people.		Individuals - innovation recipients: motivation Innovation - adaptability, evidence-base Implementation process - engaging: innovation recipients	Ensure care providers use lay language and minimal medical jargon when explaining guideline recommendations to postpartum families. This can prevent misunderstandings and misinterpretations of recommendations.		Develop an implementation glossary Involve patients/consumers and family members Prepare patients/consumers to be active participants
		When care providers do not explain the rationale for recommendations/care decisions and alternative care options.		When care providers discuss rationale of recommendations and alternative care options.		Implementation process - engaging: innovation recipients Individuals - innovation recipients: capability, innovation deliverers: motivation Innovation - design, apaptability	Setting expectations at a facility level that care decisions based on policies or guidelines are explained clearly and consistently to postpartum people and families. When delivering education, meeting families where they are at, some want detailed evidence to explain care choices, others want simple explanations. Tailoring communication methods and consumer resources to support this to ensure ev…		Involve executive boards Identify and prepare champions Prepare patients/consumers to be active participants Obtain and use patients/consumers and family feedback Tailor strategies Distribute educational materials Prepare patients/consumers to be active participants Involve patients/consumers and family members Prepare patients/consumers to be active participants
		Guidelines and policies that don't allow for individual circumstances. Developing standardised guidance for complex, nuanced topics (such as perinatal mental health, birth trauma) is challenging.	MW01 "Maybe a bit too much, and in that it's taking away individualized care. AB: Ah, interesting. MW01: Um, and you see that a lot, for example, with like postpartum bladder management, like people are just very black and white and following what the guidelines say, but not taking into account the actual clinical situation. AB: And what are the downfalls of that? MW01: Um, either over treating. …	When more experienced team members provide junior staff with practical guidance and demonstrate interactions with complex patients. This includes learning how to identify and suppport people who experienced their birth as traumatic. When care providers integrate guideline recommendations with their clinical judgement to view postpartum families holistically, creating care plans that are tailored …	"What I find is that every midwife has their own methods of practice. And you know, with years of service, years of experience, you do learn a few tricks and sometimes people don't use the guidelines stringently. And I personally, I'm kind of probably at that stage of my career where I kind of go, I think I know what I'm doing around this and the guideline is a guideline. It's not. It doesn't hav…	Innovation - adaptability, complexity Individuals - innovation deliverers: motivation, capability, innovation recipient: needs Inner setting - culture: human equality-centeredness, learning-centeredness (facilitator), relational connections (facilitator)	Utilising checklists can be helpful to remind care providers what clinical tasks and educational components are still required. However improper use of checklists, can lead to postpartum people feeling rushed through as providers are just wanting to "tick boxes". To mitigate this, ensure care providers are trained in how to use checklists effectively while continuing to provide individualised car…	"The the flowcharts are helping to make decisions, clinical decisions. But the part that staff don't utilise, is so they kind of follow it without thinking what what's my gut feeling about this baby?" GD01 “And a lot of the time in postnatal care, you're not dealing with disease or illness, you're dealing with, I don't know, a set of symptoms, concerns. And so just having a practical checklist is…	Remind clinicians Conduct ongoing training Prepare patients/consumers to be active participants Develop educational materials Tailor strategies Involve patients/consumers and family members Prepare patients/consumers to be active participants
		Developing national guidelines when consumer needs/wants are diverse is challenging.				Innovation - complexity Outer setting - partnerships and connections, local conditions Implementation process - planning, engaging Individuals - innovation recipients: needs
		Guidelines developed without diverse consumer input and are therefore often not sensitive to the Aboriginal population, various cultures, religions, gender identities and family structures.	" the thing is that if their elders tell them that they have to be there at a certain time and a place, then they've gotta be there. It doesn't matter where they're at in their pregnancy, what's going on, what's happening. They will drop everything to be there for their family because that's their cultural responsibility." FM12	When guidelines seek diverse input and feedback from postpartum people and families during development. Guidelines that use intentional, inclusive language.		Implementation process - engaging: innovation recipients, planning Individuals - innovation recipients: needs Innovation - complexity, design, adaptability	Ensuring guidelines consider and include recommendations, or sub-recommendations for priority population groups. Early during guideline development, establish writing guidance to ensure language used is consistent and inclusive. Ensuring intentional and inclusive language is used during the writing of guidelines promotes respectful, woman-centred care. Introducing processes to ensure there is eng…	"And the other thing, of course, is that when you're developing those guidelines, and I think particularly in this area, it's that the, you know, the women themselves have a say in what would be good for them" OB05	Tailor strategies Conduct local needs assessment Develop educational materials Tailoring strategies Develop educational materials Involve patients/consumers and family members Conduct local consensus discussions Obtain and use patients/consumers and family feedback Involve patients/consumers and family members Conduct local needs assessment Develop and organize quality monitoring systems Tailor s…
		When postpartum people providing guideline feedback disagree about recommendations.				Individuals - innovation recipients: needs, motivation Innovation - complexity, evidence-base Implementation process - engaging: innovation recipients
		Health misinformation is becoming more prevalent. This is a particular problem for vaccine skepticism.				Outer setting - local conditions, societal pressure Individuals - innovation recipients: motivation, capability Innovation - source, evidence-base
		Guidelines do not usually include recommendations about the non birthing partner.				Innovation - design Implementation process - assessing needs: innovation recipients Individuals - innovation recipients: needs
		When rural and remote facility guidelines and policies advise women to birth in a regional or metropolitan setting, removing them from social supports.				Outer setting - local conditions, financing, policies and laws Inner setting - compatability, culture: human equality-centeredness, relational connections Innovation - adaptability Implementation process - assessing context Individuals - innovation recipients: need	Developing the evidence base and subsequently guideline recommendations about under what circumstances Telehealth is appropriate and when in person appointments are required. This includes routine check ups and specialist appointments.		Conduct local needs assessment Develop and implement tools for quality monitoring Purposely reexamine the implementation Tailor strategies Develop educational materials
		Some providers feel that families won't know what care to expect if living guideline recommendations change frequently.		Living guideline recommendations rarely change dramatically (more common for the strength of evidence to change than recommending a change to clinical practice).		Innovation - design, evidence-base, complexity Individuals - innovation recipients: motivation, capability
		Many birthing people are setting unrealistically high expectations of the postnatal period and what they believe their healthcare services will provide (and are therefore less accepting of what recommended care practices are). Care providers feel that inadequate antenatal education about the postnatal period and the influence of social media has contributed to the rise in expectations.	“sometimes just the expectations of the woman and family may not line up at all with what the hospital's able to offer. And so I think that's a really difficult thing to figure out a solution for” MW07 "a lot of parents often say, you know, that they've spent, you know, nine months or whatever sort of thinking about birth and then they're like, “oh God, I didn't think anything about taking this b…	Families who have attended antenatal education that has contained information about the postnatal period set more realistic expectations for their care.		Outer setting - societal pressure, local conditions Individuals - innovation recipients: motivation, capability
